# Supplementary material for: A Metabolomic Severity Score for Airflow Obstruction and Emphysema
Source: MDPI journal article supplement (doi:10.3390/metabo12050368), 2022-04-19
Supplement: s1 [file s1]

Table S1: All metabolites selected with the adaLASSO procedure, the adaLASSO coefficient, and super pathway and sub pathway annotation from Metabolon.

| Metabolite                                    | adaLASSO $\beta$ | Super Pathway (Metabolon)         | Sub Pathway (Metabolon)                                      |
|-----------------------------------------------|------------------|-----------------------------------|--------------------------------------------------------------|
| vanillylmandelate (VMA)                       | -0.5654          | Amino Acid                        | Tyrosine Metabolism                                          |
| N1-methyladenosine                            | -0.3571          | Nucleotide                        | Purine Metabolism, Adenine containing                        |
| glutamine                                     | -0.3414          | Amino Acid                        | Glutamate Metabolism                                         |
| 2-hydroxypalmitate                            | -0.3264          | Lipid                             | Fatty Acid, Monohydroxy                                      |
| choline phosphate                             | 0.2924           | Lipid                             | Phospholipid Metabolism                                      |
| 1-palmitoyl-2-stearoyl-GPC (16:0/18:0)        | 0.2912           | Lipid                             | Phosphatidylcholine (PC)                                     |
| cerotoylcarnitine (C26)*                      | 0.2859           | Lipid                             | Fatty Acid Metabolism (Acyl Carnitine, Long Chain Saturated) |
| phenylalanine                                 | -0.2675          | Amino Acid                        | Phenylalanine Metabolism                                     |
| dimethylarginine (SDMA + ADMA)                | 0.2646           | Amino Acid                        | Urea cycle; Arginine and Proline Metabolism                  |
| myo-inositol                                  | 0.2568           | Lipid                             | Inositol Metabolism                                          |
| imidazole lactate                             | 0.2561           | Amino Acid                        | Histidine Metabolism                                         |
| 1-stearoyl-2-arachidonoyl-GPC (18:0/20:4)     | -0.2456          | Lipid                             | Phosphatidylcholine (PC)                                     |
| N-acetylvaline                                | 0.2374           | Amino Acid                        | Leucine, Isoleucine and Valine Metabolism                    |
| taurine                                       | -0.2325          | Amino Acid                        | Methionine, Cysteine, SAM and Taurine Metabolism             |
| sulfate*                                      | 0.2325           | Xenobiotics                       | Chemical                                                     |
| 3-methyl-2-oxovalerate                        | -0.2206          | Amino Acid                        | Leucine, Isoleucine and Valine Metabolism                    |
| gamma-glutamylthreonine                       | 0.2162           | Peptide                           | Gamma-glutamyl Amino Acid                                    |
| proline                                       | 0.2127           | Amino Acid                        | Urea cycle; Arginine and Proline Metabolism                  |
| mannonate*                                    | -0.2107          | Xenobiotics                       | Food Component/Plant                                         |
| retinol (vitamin A)                           | 0.2103           | Cofactors and Vitamins            | Vitamin A Metabolism                                         |
| sphingomyelin (d18:2/21:0, d16:2/23:0)*       | -0.1919          | Lipid                             | Sphingomyelins                                               |
| N-acetylcarnosine                             | 0.1825           | Amino Acid                        | Histidine Metabolism                                         |
| 3beta-hydroxy-5-cholestenoate                 | 0.1798           | Lipid                             | Sterol                                                       |
| pimelate (C7-DC)                              | -0.1790          | Lipid                             | Fatty Acid, Dicarboxylate                                    |
| 3-hydroxy-2-ethylpropionate                   | 0.1707           | Amino Acid                        | Leucine, Isoleucine and Valine Metabolism                    |
| 12,13-DiHOME                                  | 0.1642           | Lipid                             | Fatty Acid, Dihydroxy                                        |
| threonine                                     | -0.1623          | Amino Acid                        | Glycine, Serine and Threonine Metabolism                     |
| 2'-O-methyluridine                            | -0.1592          | Nucleotide                        | Pyrimidine Metabolism, Uracil containing                     |
| glycosyl-N-palmitoyl-sphingosine (d18:1/16:0) | -0.1482          | Lipid                             | Hexosylceramides (HCER)                                      |
| 1-(1-enyl-palmitoyl)-GPC (P-16:0)*            | 0.1409           | Lipid                             | Lysoplasmalogen                                              |
| thyroxine                                     | -0.1408          | Amino Acid                        | Tyrosine Metabolism                                          |
| N-acetylalanine                               | 0.1276           | Amino Acid                        | Alanine and Aspartate Metabolism                             |
| salicyluric glucuronide*                      | -0.1253          | Xenobiotics                       | Drug - Analgesics, Anesthetics                               |
| 5-hydroxyhexanoate                            | -0.1220          | Lipid                             | Fatty Acid, Monohydroxy                                      |
| carnitine                                     | -0.1200          | Lipid                             | Carnitine Metabolism                                         |
| tyrosine                                      | -0.1188          | Amino Acid                        | Tyrosine Metabolism                                          |
| creatine                                      | -0.1155          | Amino Acid                        | Creatine Metabolism                                          |
| cysteinyglycine                               | 0.1146           | Amino Acid                        | Glutathione Metabolism                                       |
| ergothioneine                                 | 0.1142           | Xenobiotics                       | Food Component/Plant                                         |
| alpha-tocopherol                              | -0.1141          | Cofactors and Vitamins            | Tocopherol Metabolism                                        |
| arginine                                      | -0.1121          | Amino Acid                        | Urea cycle; Arginine and Proline Metabolism                  |
| glucuronide of C12H22O4 (1)*                  | -0.1109          | Partially Characterized Molecules | Partially Characterized Molecules                            |
| alpha-hydroxyisocaproate                      | 0.1095           | Amino Acid                        | Leucine, Isoleucine and Valine Metabolism                    |

| Metabolite                                             | adaLASSO $\beta$ | Super Pathway (Metabolon) | Sub Pathway (Metabolon)                                 |
|--------------------------------------------------------|------------------|---------------------------|---------------------------------------------------------|
| hydroxyasparagine**                                    | -0.1038          | Amino Acid                | Alanine and Aspartate Metabolism                        |
| L-urobilin                                             | 0.1023           | Cofactors and Vitamins    | Hemoglobin and Porphyrin Metabolism                     |
| N-acetylglutamate                                      | -0.0973          | Amino Acid                | Glutamate Metabolism                                    |
| citrulline                                             | -0.0967          | Amino Acid                | Urea cycle; Arginine and Proline Metabolism             |
| biliverdin                                             | 0.0967           | Cofactors and Vitamins    | Hemoglobin and Porphyrin Metabolism                     |
| 5alpha-androstan-3alpha,17beta-diol disulfate          | 0.0933           | Lipid                     | Androgenic Steroids                                     |
| 7alpha-hydroxy-3-oxo-4-cholestenoa te (7-Hoca)         | -0.0927          | Lipid                     | Sterol                                                  |
| 2-palmitoyl-GPC (16:0)*                                | 0.0904           | Lipid                     | Lysophospholipid                                        |
| 3-ureidopropionate                                     | 0.0875           | Nucleotide                | Pyrimidine Metabolism, Uracil containing                |
| nisinate (24:6n3)                                      | 0.0855           | Lipid                     | Long Chain Polyunsaturated Fatty Acid (n3 and n6)       |
| 1-linoleoyl-2-arachidonoyl-GPC (18:2/20:4n6)*          | -0.0846          | Lipid                     | Phosphatidylcholine (PC)                                |
| 1-(1-enyl-palmitoyl)-2-palmitoleoyl-GPC (P-16:0/16:1)* | -0.0829          | Lipid                     | Plasmalogen                                             |
| acisoga                                                | -0.0813          | Amino Acid                | Polyamine Metabolism                                    |
| alpha-ketoglutarate*                                   | 0.0775           | Amino Acid                | Glutamate Metabolism                                    |
| alpha-ketoglutarate                                    | -0.0749          | Energy                    | TCA Cycle                                               |
| alpha-hydroxycaproate                                  | -0.0744          | Lipid                     | Fatty Acid, Monohydroxy                                 |
| erucate (22:1n9)                                       | -0.0737          | Lipid                     | Long Chain Monounsaturated Fatty Acid                   |
| 1-(1-enyl-palmitoyl)-2-oleoyl-GPC (P-16:0/18:1)*       | -0.0717          | Lipid                     | Plasmalogen                                             |
| aspartate                                              | 0.0696           | Amino Acid                | Alanine and Aspartate Metabolism                        |
| pregnenediol sulfate (C21H34O5S)*                      | 0.0679           | Lipid                     | Pregnenolone Steroids                                   |
| N-stearoyl-sphingadienine (d18:2/18:0)*                | -0.0668          | Lipid                     | Ceramides                                               |
| carboxyethyl-GABA                                      | 0.0641           | Amino Acid                | Glutamate Metabolism                                    |
| fumarate                                               | -0.0624          | Energy                    | TCA Cycle                                               |
| alpha-CEHC sulfate                                     | -0.0622          | Cofactors and Vitamins    | Tocopherol Metabolism                                   |
| gamma-glutamylleucine                                  | 0.0618           | Peptide                   | Gamma-glutamyl Amino Acid                               |
| cis-4-decenoylcarnitine (C10:1)                        | -0.0577          | Lipid                     | Fatty Acid Metabolism (Acyl Carnitine, Monounsaturated) |
| 2-aminobutyrate                                        | 0.0571           | Amino Acid                | Glutathione Metabolism                                  |
| prolylglycine                                          | -0.0557          | Peptide                   | Dipeptide                                               |
| dihydroferulic acid sulfate                            | -0.0549          | Xenobiotics               | Food Component/Plant                                    |
| serine                                                 | 0.0528           | Amino Acid                | Glycine, Serine and Threonine Metabolism                |
| lactate                                                | -0.0485          | Carbohydrate              | Glycolysis, Gluconeogenesis, and Pyruvate Metabolism    |
| N-acetylputrescine                                     | -0.0484          | Amino Acid                | Polyamine Metabolism                                    |
| N-acetyl glycine                                       | 0.0483           | Amino Acid                | Glycine, Serine and Threonine Metabolism                |
| cysteine                                               | 0.0471           | Amino Acid                | Methionine, Cysteine, SAM and Taurine Metabolism        |
| octanoylcarnitine (C8)                                 | -0.0455          | Lipid                     | Fatty Acid Metabolism (Acyl Carnitine, Medium Chain)    |
| adenosine 5'-monophosphate (AMP)                       | -0.0440          | Nucleotide                | Purine Metabolism, Adenine containing                   |
| vanillactate                                           | -0.0436          | Amino Acid                | Tyrosine Metabolism                                     |
| lactosyl-N-palmitoyl-sphingosine (d18:1/16:0)          | 0.0434           | Lipid                     | Lactosylceramides (LCER)                                |
| 3-methoxytyramine sulfate                              | -0.0428          | Amino Acid                | Tyrosine Metabolism                                     |
| 4-hydroxyglutamate                                     | -0.0399          | Amino Acid                | Glutamate Metabolism                                    |
| acesulfame                                             | 0.0311           | Xenobiotics               | Food Component/Plant                                    |
| 3-ethylcatechol sulfate (2)                            | 0.0302           | Xenobiotics               | Food Component/Plant                                    |

| Metabolite                                                               | adaLASSO $\beta$ | Super Pathway (Metabolon)         | Sub Pathway (Metabolon)                                 |
|--------------------------------------------------------------------------|------------------|-----------------------------------|---------------------------------------------------------|
| arachidonoylcarnitine (C20:4)                                            | 0.0301           | Lipid                             | Fatty Acid Metabolism (Acyl Carnitine, Polyunsaturated) |
| N,N,N-trimethyl-5-aminovalerate                                          | -0.0300          | Amino Acid                        | Lysine Metabolism                                       |
| eicosanedioate (C20-DC)                                                  | 0.0298           | Lipid                             | Fatty Acid, Dicarboxylate                               |
| bilirubin (Z,Z)                                                          | 0.0295           | Cofactors and Vitamins            | Hemoglobin and Porphyrin Metabolism                     |
| sarcosine                                                                | -0.0293          | Amino Acid                        | Glycine, Serine and Threonine Metabolism                |
| valerate (5:0)                                                           | -0.0290          | Lipid                             | Short Chain Fatty Acid                                  |
| 1-palmitoyl-2-palmitoleoyl-GPC (16:0/16:1)*                              | -0.0289          | Lipid                             | Phosphatidylcholine (PC)                                |
| picolinate                                                               | -0.0284          | Amino Acid                        | Tryptophan Metabolism                                   |
| isobutyrylcarnitine (C4)                                                 | -0.0280          | Amino Acid                        | Leucine, Isoleucine and Valine Metabolism               |
| umbelliferone sulfate                                                    | 0.0280           | Xenobiotics                       | Food Component/Plant                                    |
| glycerophosphoethanolamine sulfate of piperine metabolite C16H19NO3 (3)* | -0.0269          | Lipid                             | Phospholipid Metabolism                                 |
|                                                                          | -0.0268          | Xenobiotics                       | Food Component/Plant                                    |
| 1-(1-enyl-palmitoyl)-2-linoleoyl-GP C (P-16:0/18:2)*                     | 0.0234           | Lipid                             | Plasmalogen                                             |
| 1-stearoyl-2-docosahexaenoyl-GPC (18:0/22:6)                             | -0.0232          | Lipid                             | Phosphatidylcholine (PC)                                |
| 2-methylcitrate/homocitrate                                              | 0.0227           | Energy                            | TCA Cycle                                               |
| 4-hydroxyphenylacetyl carnitine                                          | -0.0226          | Amino Acid                        | Tyrosine Metabolism                                     |
| indoleacetyl carnitine*                                                  | -0.0226          | Amino Acid                        | Tryptophan Metabolism                                   |
| N-acetyl-isoputrescine                                                   | -0.0222          | Amino Acid                        | Polyamine Metabolism                                    |
| N-stearoyltaurine                                                        | -0.0207          | Lipid                             | Endocannabinoid                                         |
| N-acetylkynurenine (2)                                                   | 0.0204           | Amino Acid                        | Tryptophan Metabolism                                   |
| 5,6-dihydrothymine                                                       | -0.0204          | Nucleotide                        | Pyrimidine Metabolism, Thymine containing               |
| sphingomyelin (d18:1/18:1, d18:2/18:0)                                   | -0.0204          | Lipid                             | Sphingomyelins                                          |
| isoleucylglycine                                                         | 0.0200           | Peptide                           | Dipeptide                                               |
| choline                                                                  | 0.0196           | Lipid                             | Phospholipid Metabolism                                 |
| I-urobilinogen                                                           | -0.0192          | Cofactors and Vitamins            | Hemoglobin and Porphyrin Metabolism                     |
| 1-stearoyl-2-linoleoyl-GPC (18:0/18:2)*                                  | -0.0181          | Lipid                             | Phosphatidylcholine (PC)                                |
| glycerol                                                                 | -0.0173          | Lipid                             | Glycerolipid Metabolism                                 |
| 3-hydroxyoleoylcarnitine                                                 | -0.0173          | Lipid                             | Fatty Acid Metabolism (Acyl Carnitine, Hydroxy)         |
| glucuronide of C10H18O2 (7)*                                             | 0.0167           | Partially Characterized Molecules | Partially Characterized Molecules                       |
| docosadioate (C22-DC)                                                    | 0.0154           | Lipid                             | Fatty Acid, Dicarboxylate                               |
| nicotinamide                                                             | 0.0153           | Cofactors and Vitamins            | Nicotinate and Nicotinamide Metabolism                  |
| beta-cryptoxanthin                                                       | 0.0139           | Cofactors and Vitamins            | Vitamin A Metabolism                                    |
| thioprolin                                                               | 0.0121           | Xenobiotics                       | Chemical                                                |
| 6-oxopiperidine-2-carboxylate                                            | -0.0109          | Amino Acid                        | Lysine Metabolism                                       |
| N-acetylglucosamine/N-acetylgalactosamine                                | -0.0108          | Carbohydrate                      | Aminosugar Metabolism                                   |
| 1-methyl-4-imidazoleacetate                                              | -0.0106          | Amino Acid                        | Histidine Metabolism                                    |
| 2-acetamidophenol sulfate                                                | 0.0094           | Xenobiotics                       | Food Component/Plant                                    |
| 3-methylcytidine                                                         | 0.0088           | Nucleotide                        | Pyrimidine Metabolism, Cytidine containing              |
| stearoyl ethanolamide                                                    | 0.0078           | Lipid                             | Endocannabinoid                                         |
| N-acetylglucosaminylasparagine                                           | -0.0072          | Carbohydrate                      | Aminosugar Metabolism                                   |
| 1,7-dimethylurate                                                        | -0.0071          | Xenobiotics                       | Xanthine Metabolism                                     |
| N4-acetylcytidine                                                        | -0.0057          | Nucleotide                        | Pyrimidine Metabolism, Cytidine containing              |
| campesterol                                                              | -0.0033          | Lipid                             | Sterol                                                  |
| 2-oxoarginine*                                                           | -0.0027          | Amino Acid                        | Urea cycle; Arginine and Proline Metabolism             |
| homoarginine                                                             | 0.0010           | Amino Acid                        | Urea cycle; Arginine and Proline Metabolism             |

| Metabolite                                       | adaLASSO $\beta$ | Super Pathway<br>(Metabolon) | Sub Pathway (Metabolon)                              |
|--------------------------------------------------|------------------|------------------------------|------------------------------------------------------|
| heneicosapentaenoate (21:5n3)                    | 0.0006           | Lipid                        | Long Chain Polyunsaturated Fatty Acid (n3<br>and n6) |
| oleoyl-arachidonoyl-glycerol<br>(18:1/20:4) [2]* | 0.0003           | Lipid                        | Diacylglycerol                                       |

Table S2: Adjusted R<sup>2</sup> and MSE from Linear Regression Model for MESA-adjusted Lung Density

|                       | MESA-adjusted Lung Density (129 Metabolites) |            |                                 |                                       |            |                                 |
|-----------------------|----------------------------------------------|------------|---------------------------------|---------------------------------------|------------|---------------------------------|
|                       | Adjusted R <sup>2</sup>                      |            |                                 | MSE                                   |            |                                 |
|                       | Clinical Covariates <sup>1</sup> Only        | metSS Only | metSS + Covariates <sup>1</sup> | Clinical Covariates <sup>1</sup> Only | metSS Only | metSS + Covariates <sup>1</sup> |
| SPIROMICS (training)  | 38.1                                         | 59.0       | 63.0                            | 359.17                                | 243.23     | 214.19                          |
| COPDGene (validation) | 38.2                                         | 17.4       | 42.2                            | 311.41                                | 419.87     | 291.13                          |

<sup>1</sup>clinical covariates: gender, age, race/ethnicity, BMI, Smoking Status, Smoking pack-years, clinical site & CT scanner model

Table S3: Sensitivity Analysis: Adjusted R<sup>2</sup> and MSE from Linear Regression Models for FEV<sub>1</sub>

|                                                             |                           | FEV <sub>1</sub>     |                                             |               |                                    |                                             |               |                                    |
|-------------------------------------------------------------|---------------------------|----------------------|---------------------------------------------|---------------|------------------------------------|---------------------------------------------|---------------|------------------------------------|
|                                                             |                           | # of Met<br>selected | Adjusted R <sup>2</sup>                     |               |                                    | Mean Squared Error                          |               |                                    |
|                                                             |                           |                      | Clinical<br>Covariates <sup>1</sup><br>Only | metSS<br>Only | metSS +<br>Covariates <sup>1</sup> | Clinical<br>Covariates <sup>1</sup><br>Only | metSS<br>Only | metSS +<br>Covariates <sup>1</sup> |
| Exchanging the<br>training &<br>validation data             | COPDGene<br>(training)    | 206                  | 46.4                                        | 63.7          | 69.0                               | 0.435                                       | 0.297         | 0.251                              |
|                                                             | SPIROMICS<br>(validation) |                      | 42.1                                        | 33.6          | 47.8                               | 0.397                                       | 0.465         | 0.357                              |
| Weighting the<br>highest &<br>lowest quintiles<br>of values | SPIROMICS<br>(training)   | 114                  | 42.1                                        | 58.3          | 65.2                               | 0.397                                       | 0.292         | 0.238                              |
|                                                             | COPDGene<br>(validation)  |                      | 46.4                                        | 26.1          | 51.7                               | 0.435                                       | 0.605         | 0.392                              |

<sup>1</sup>clinical covariates: gender, age, height, race/ethnicity, BMI, Smoking Status, Smoking pack-years & clinical site  
 “# of Met selected” refers to the number of metabolites selected by the adaptive LASSO.

For high and low quintile weighting the extreme value were weight by a factor of 5 in the training data set.

Table S4: Sensitivity Analysis: Adjusted R<sup>2</sup> and MSE from Linear Regression Models for MESA-adjusted Lung Density

|                                                             |                           | MESA-adjusted Lung Density |                                             |               |                                    |                                             |               |                                    |
|-------------------------------------------------------------|---------------------------|----------------------------|---------------------------------------------|---------------|------------------------------------|---------------------------------------------|---------------|------------------------------------|
|                                                             |                           | Adjusted R <sup>2</sup>    |                                             |               |                                    | MSE                                         |               |                                    |
|                                                             |                           | # of Met<br>selected       | Clinical<br>Covariates <sup>1</sup><br>Only | metSS<br>Only | metSS +<br>Covariates <sup>1</sup> | Clinical<br>Covariates <sup>1</sup><br>Only | metSS<br>Only | metSS +<br>Covariates <sup>1</sup> |
| Exchanging the<br>training &<br>validation data             | COPDGene<br>(training)    | 275                        | 38.2                                        | 64.4          | 68.7                               | 311.41                                      | 181.10        | 157.62                             |
|                                                             | SPIROMICS<br>(validation) |                            | 38.1                                        | 19.3          | 40.6                               | 359.17                                      | 478.95        | 344.20                             |
| Weighting the<br>highest &<br>lowest quintiles<br>of values | SPIROMICS<br>(training)   | 133                        | 38.1                                        | 55.5          | 60.3                               | 359.17                                      | 264.16        | 229.87                             |
|                                                             | COPDGene<br>(validation)  |                            | 38.2                                        | 15.6          | 41.6                               | 311.41                                      | 428.80        | 293.99                             |

<sup>1</sup>clinical covariates: gender, age, race/ethnicity, BMI, Smoking Status, Smoking pack-years, clinical site & CT scanner model  
 “# of Met selected” refers to the number of metabolites selected by the adaptive LASSO.

For high and low quintile weighting the extreme value were weight by a factor of 5 in the training data set.

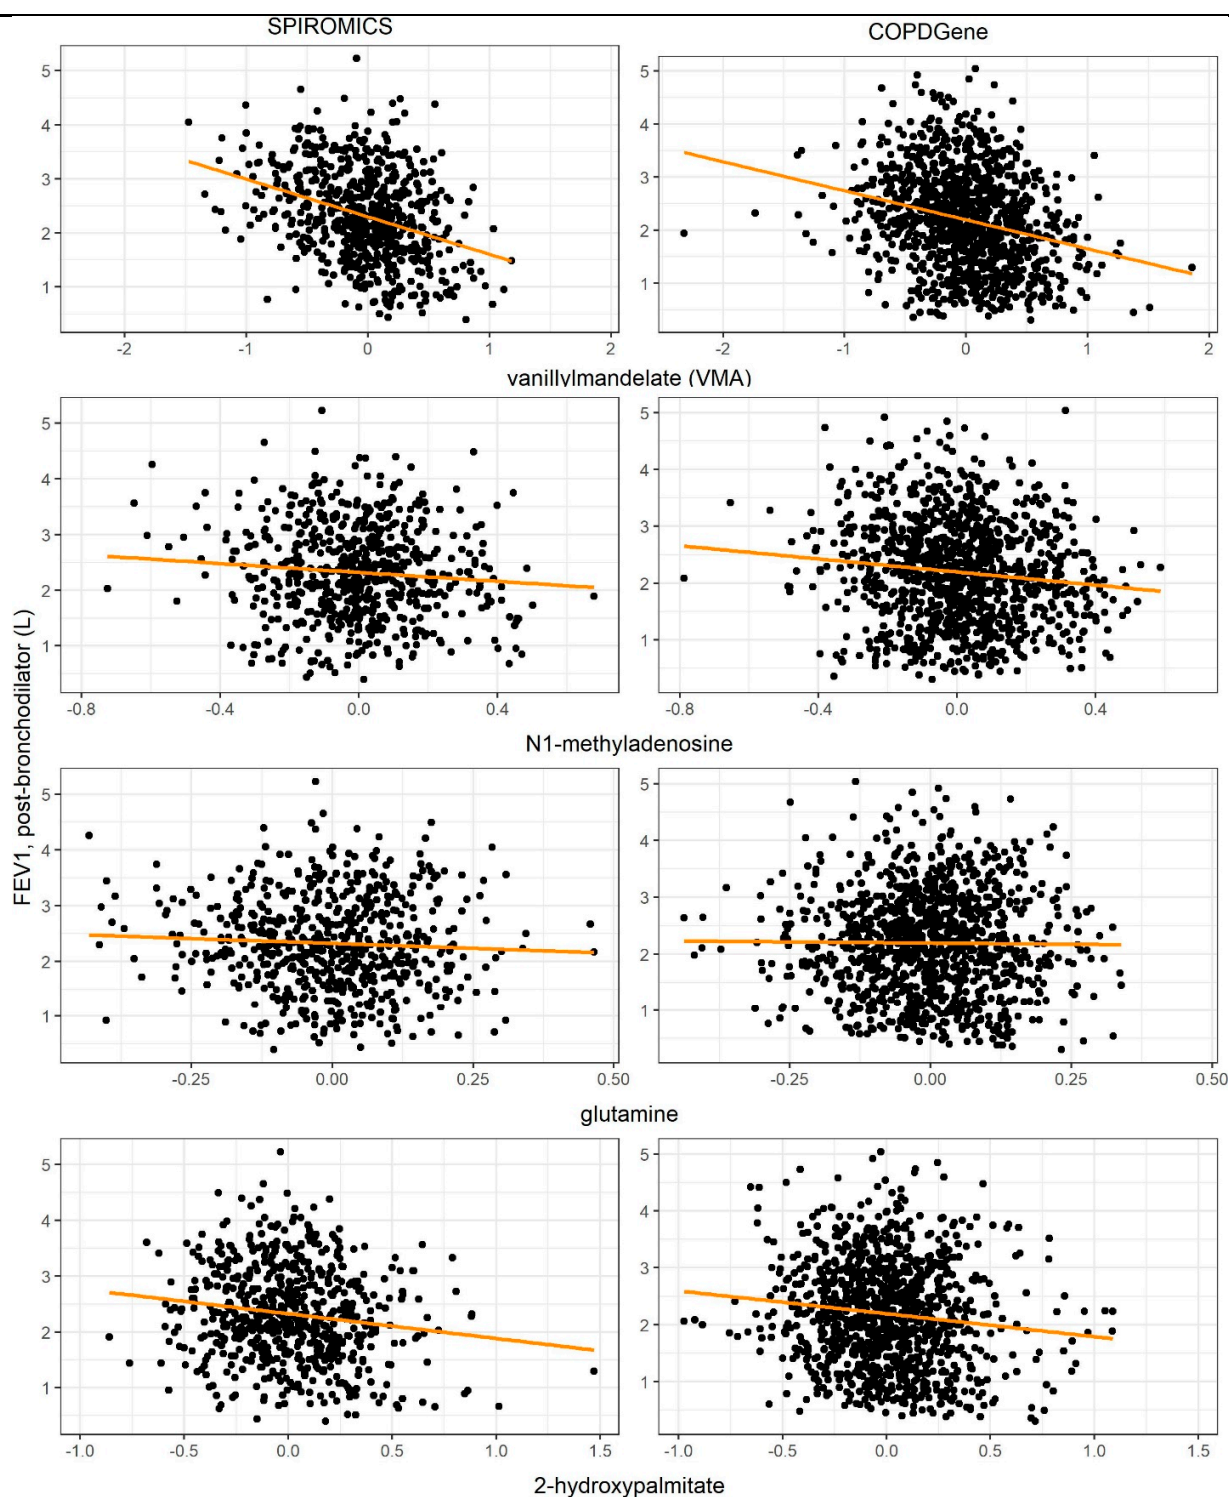

Figure S1: Scatterplots of FEV<sub>1</sub> postbronchodilator (L) and 4 strongest effect metabolites from the adaLASSO model in the training and validation cohort. Orange line indicates the association between the single metabolite and FEV<sub>1</sub>.
